# Supplementary material
Source: publisher figshare collection journal article supplement (https://tandf.figshare.com/articles/dataset/_/13372313)
Supplement: Supplementary file [file 1]

**Supplemental table 1 Characteristics of participants in 2010 and 2017.**

|                                    | 2010 cohort      | 2017 cohort      | <i>P</i> value |
|------------------------------------|------------------|------------------|----------------|
| n                                  | 3712             | 3712             |                |
| BMI (kg/m <sup>2</sup> )           | 23.60±3.61       | 23.94±3.21       | <0.001         |
| SBP (mmHg)                         | 121.07±17.05     | 125.31±18.27     | <0.001         |
| DBP (mmHg)                         | 77.31±11.88      | 77.70±12.29      | <0.001         |
| TC (mmol/L)                        | 4.62±0.88        | 4.67±0.87        | <0.001         |
| TG (mmol/L)                        | 1.05 (0.72-1.61) | 1.25 (0.86-1.85) | <0.001         |
| HDL-C (mmol/L)                     | 1.34±0.32        | 1.30±0.31        | <0.001         |
| LDL-C (mmol/L)                     | 2.77±0.75        | 2.79±0.74        | 0.164          |
| AIP                                | -0.07±0.32       | 0.012±0.32       | <0.001         |
| FPG (mmol/L)                       | 5.10±0.52        | 5.30±0.84        | <0.001         |
| UA (mg/dL)                         | 310.88±84.32     | 340.59±92.58     | <0.001         |
| SCr (μmol/L)                       | 65.62±12.68      | 72.70±14.08      | <0.001         |
| eGFR (mL/min/1.73 m <sup>2</sup> ) | 110.20±10.79     | 98.11±12.88      | <0.001         |
| Hypertension, n (%)                | 785 (21.1)       | 1086 (29.3)      | <0.001         |

Data are mean ± SD, median (IQR) or percentage.

BMI, body mass index; SBP, systolic blood pressure; DBP, diastolic blood pressure; TC, total cholesterol; TG, triglyceride; LDL-C, low-density lipoprotein cholesterol; HDL-C, high-density lipoprotein cholesterol; AIP, atherogenic index of plasma; FBG, fasting plasma glucose; UA, uric acid; SCr, serum creatinine; eGFR, estimated glomerular filtration rate.
